# Supplementary material
Source: Royal Society of Chemistry journal article supplement (doi:10.1039/d6tc00448b)
Supplement: d6tc00448b1.pdf [file d6tc00448b1.pdf]

## Supplementary Materials

### Interface-engineered p-CsCu<sub>2</sub>I<sub>3</sub>/n-Ga<sub>2</sub>O<sub>3</sub> nanowires heterojunctions for self-powered ultraviolet photodetection

Ruhan Luan,<sup>a</sup> Fengzhou Zhao,<sup>\*,b</sup> Tao Chen, Daoping Peng,<sup>a</sup> Xiao Zhang,<sup>b</sup> Jixing Lin,<sup>a</sup> Dengying Zhang,<sup>b</sup> Taiping Lu<sup>b</sup> and Lichun Zhang<sup>\*,b</sup>

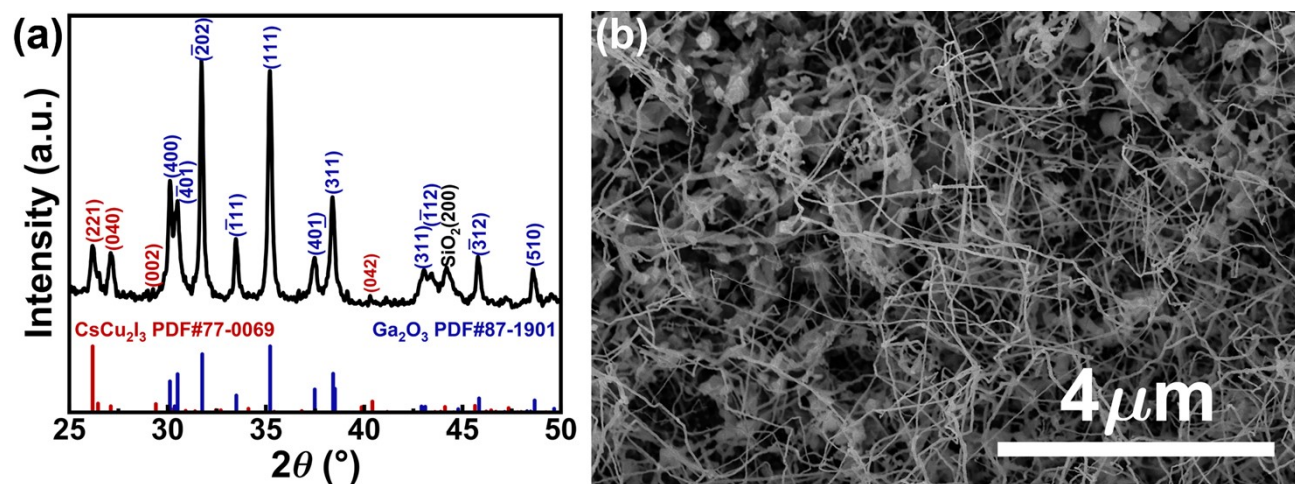

Figure S1 (a) XRD patterns of p-CsCu<sub>2</sub>I<sub>3</sub>/n-Ga<sub>2</sub>O<sub>3</sub> NWs heterojunction without CuI interlayer. (b) Surface morphology of the p-CsCu<sub>2</sub>I<sub>3</sub>/n-Ga<sub>2</sub>O<sub>3</sub> NWs heterojunction without CuI interlayer.

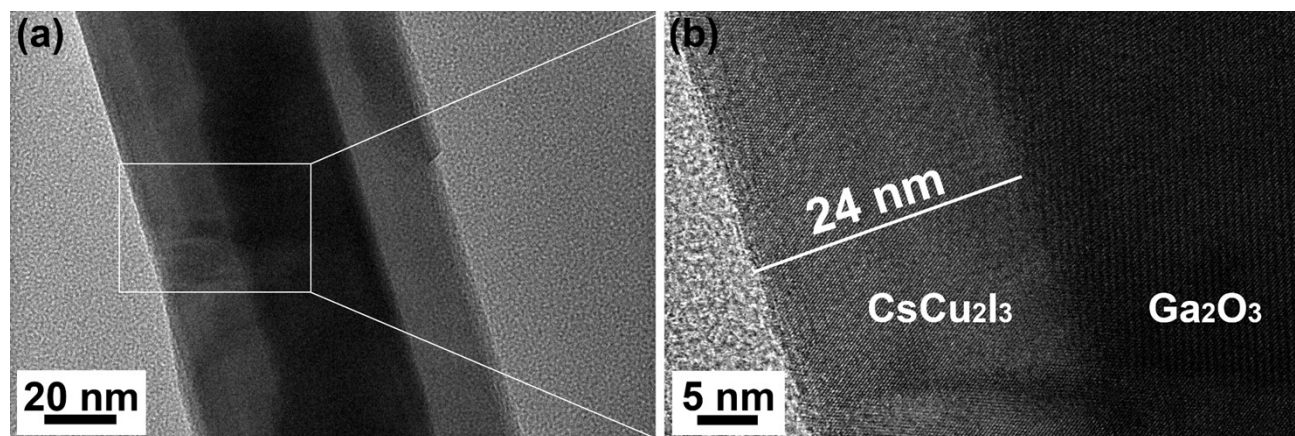

Figure S2 (a) A high-resolution TEM image of a CsCu<sub>2</sub>I<sub>3</sub>-coated Ga<sub>2</sub>O<sub>3</sub> nanowire, and (b) an enlarged image of the region marked by the white box in (a).

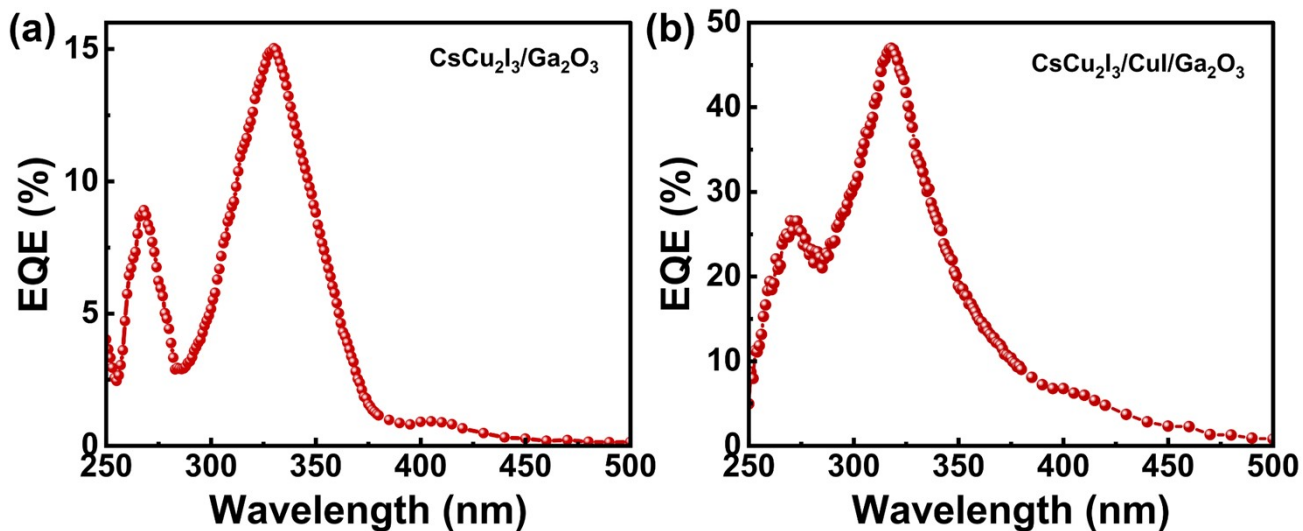

Figure S3 (a) EQE of CsCu<sub>2</sub>I<sub>3</sub>/Ga<sub>2</sub>O<sub>3</sub> PD at 0 V, (b) EQE of CsCu<sub>2</sub>I<sub>3</sub>/CuI/Ga<sub>2</sub>O<sub>3</sub> PD at 0 V.

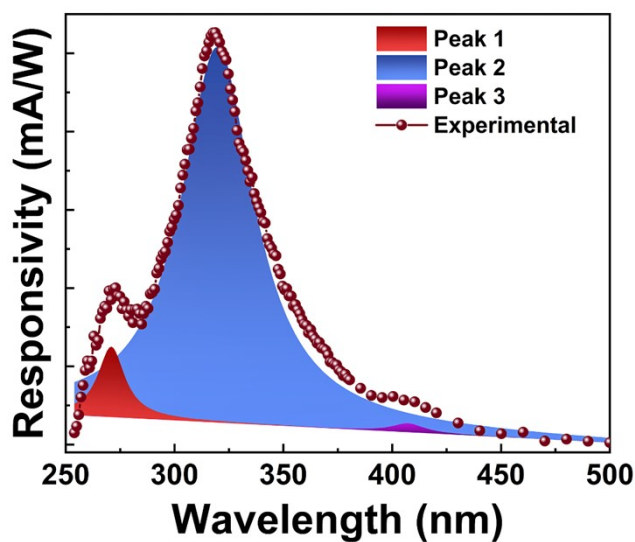

Figure S4 Spectral responsivity curve of the p-CsCu<sub>2</sub>I<sub>3</sub>/CuI/n-Ga<sub>2</sub>O<sub>3</sub> NWs PD with Gaussian peak-deconvolution fitting.

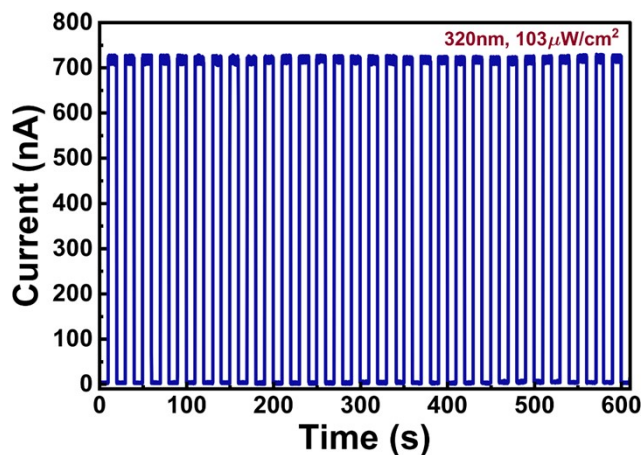

Figure S5 Cycling stability of the p-CsCu<sub>2</sub>I<sub>3</sub>/CuI/n-Ga<sub>2</sub>O<sub>3</sub> NWs PD over 30 on/off cycles at 0 V bias under 320 nm irradiation.
